# Supplementary material for: Biosynthetic rivalry of o-aminophenol-carboxylic acids initiates production of hemi-actinomycins in Streptomyces antibioticus
Source: Royal Society of Chemistry journal article supplement (doi:10.1039/c3ra45661g), 2013-12-10
Supplement: c3ra45661g.pdf [file c3ra45661g.pdf]

## Electronic Supplementary Information

### Biosynthetic rivalry of *o*-aminophenol-carboxylic acids initiates production of *hemi*-actinomycins in *Streptomyces antibioticus*

Ivana Crnovčić<sup>a</sup>, Siamak Semsary<sup>a</sup>, Joachim Vater<sup>a</sup> and Ullrich Keller<sup>a</sup>

<sup>a</sup> Technische Universität Berlin, Institut für Chemie, Müller-Breslau Strasse 10, D-10623 Berlin-Charlottenburg, Germany. Tel: ++49 (0)30 314 25477; E-mail: ullrich.keller@tu-berlin.de

## FIGURES

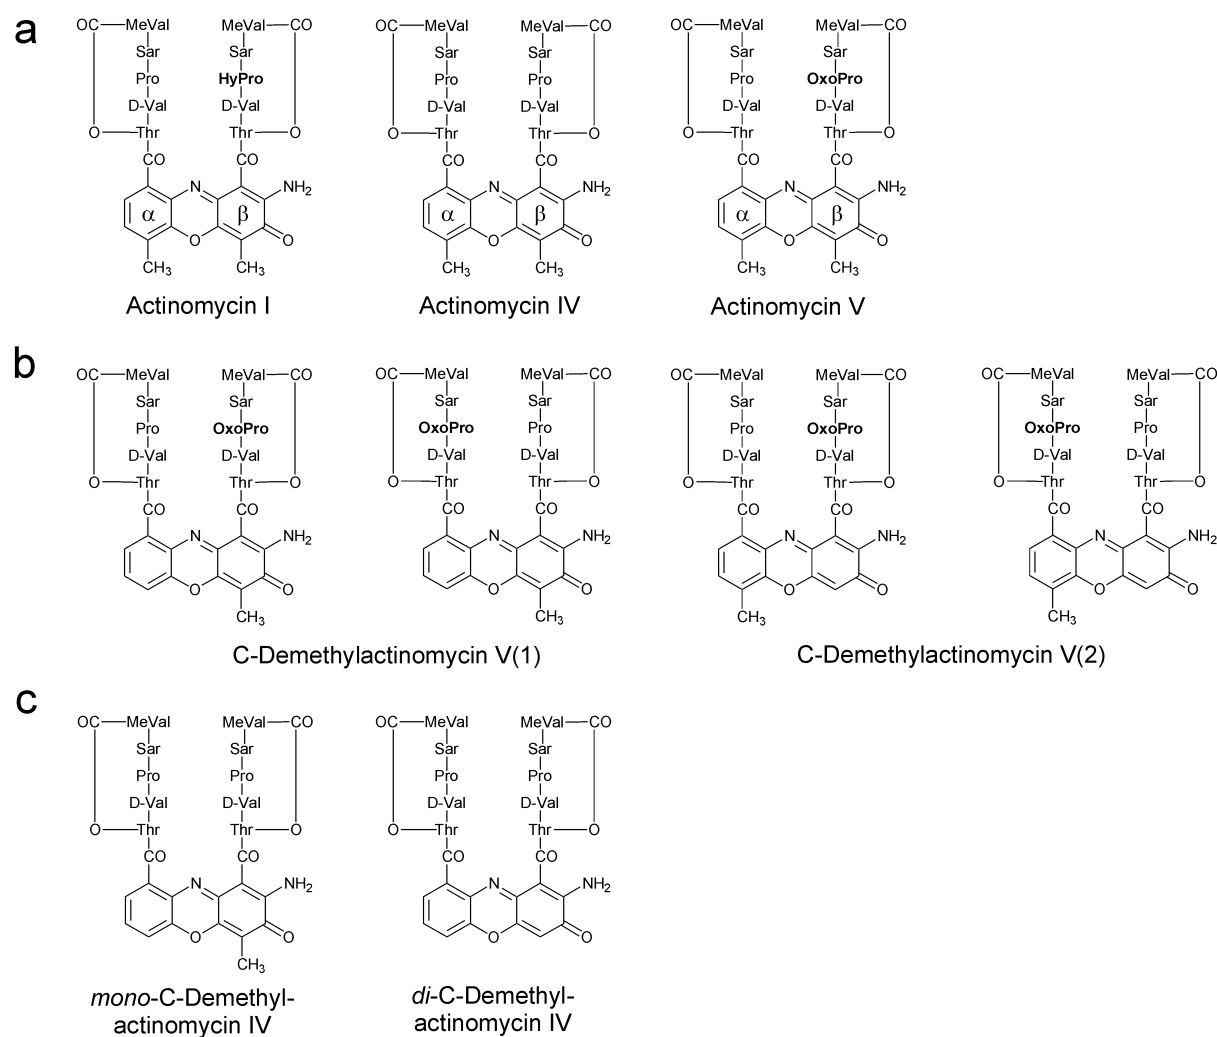

**Figure S1: Structures of the different actinomycins of the Actinomycin X complex of *S. antibioticus*.** **a:** actinomycin I, IV and V., **b:** Structures of the possible four isomeric *mono*-C-demethylactinomycins V. **c:** Structures of *mono*-C-demethylactinomycin IV (**D<sub>IV</sub>**) and *di*-C-demethylactinomycin IV (**DD<sub>IV</sub>**). Sar: N-methylglycine, MeVal: N-methyl-L-valine, HyPro: 4-hydroxyproline, OxoPro: 4-oxoproline.

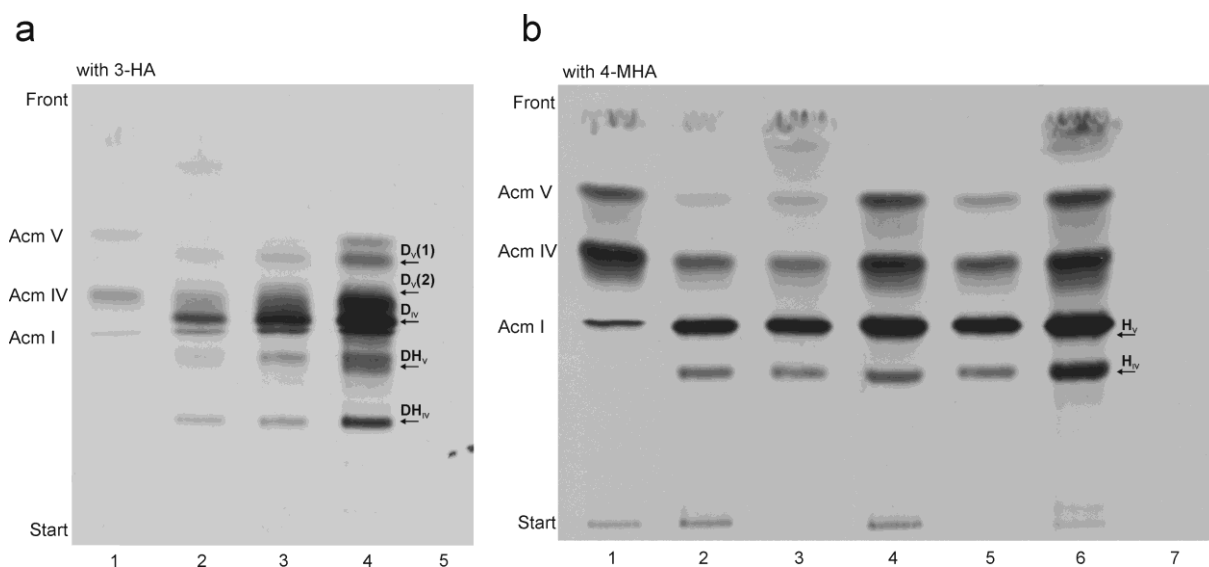

**Figure S2: Incorporation of  $^{14}\text{C}$ -labeled amino acid precursors into the pentapeptide lactone rings of C-demethylactinomycins, C-demethyl-hemi-actinomycins (a) and hemi-actinomycins (b) elaborated by *S. antibioticus*.** **a:** TLC separations of extracts from radioincorporation experiments of *S. antibioticus* mycelium with various radioactive amino acids in the presence of 250  $\mu\text{M}$  3-HA. Lane 2: Incubation with  $^{14}\text{C}$ -threonine, Lane 3: with  $^{14}\text{C}$ -proline, Lane 4: with ( $^{14}\text{C}$ -methyl)-L-methionine, Lane 5: with  $^{14}\text{C}$ -glutamic acid, Lane 1: with  $^{14}\text{C}$ -threonine with omission of 3-HA. Glutamic acid is no constituent of the peptide chains of any actinomycin and therefore is not incorporated. **b:** TLC separations of extracts from radioincorporation experiments of *S. antibioticus* mycelium with various amino acids in the presence of 250  $\mu\text{M}$  4-MHA. Lane 2: Incubation with  $^{14}\text{C}$ -valine, Lane 3: with  $^{14}\text{C}$ -threonine, Lane 4: with  $^{14}\text{C}$ -proline, Lane 5: with  $^{14}\text{C}$ -glycine, Lane 6: with  $^{14}\text{C}$ -methyl-L-methionine, Lane 7: with  $^{14}\text{C}$ -glutamic acid, Lane 1: with  $^{14}\text{C}$ -valine with omission 4-MHA. Symbols at the different bands denote new compounds as follows: **D<sub>V</sub>(1):** *mono*-C-demethylactinomycin V(1), **D<sub>V</sub>(2):** *mono*-C-demethylactinomycin V(2), **D<sub>IV</sub>:** *mono*-C-demethylactinomycin IV, **DH<sub>IV</sub>:** *mono*-C-demethyl-hemi-actinomycin V, **DH<sub>V</sub>:** *mono*-C-demethyl-hemi-actinomycin IV, **H<sub>V</sub>:** *hemi*-actinomycin V, **H<sub>IV</sub>:** *hemi*-actinomycin IV. 3-HA: 3-hydroxyanthranilic acid, 4-MHA: 4-methyl-3-hydroxyanthranilic acid, Acm: actinomycin. Separation was on silica thin-layer plates using solvent system I. Time of exposure of the chromatogram to x-ray film was 3 d.

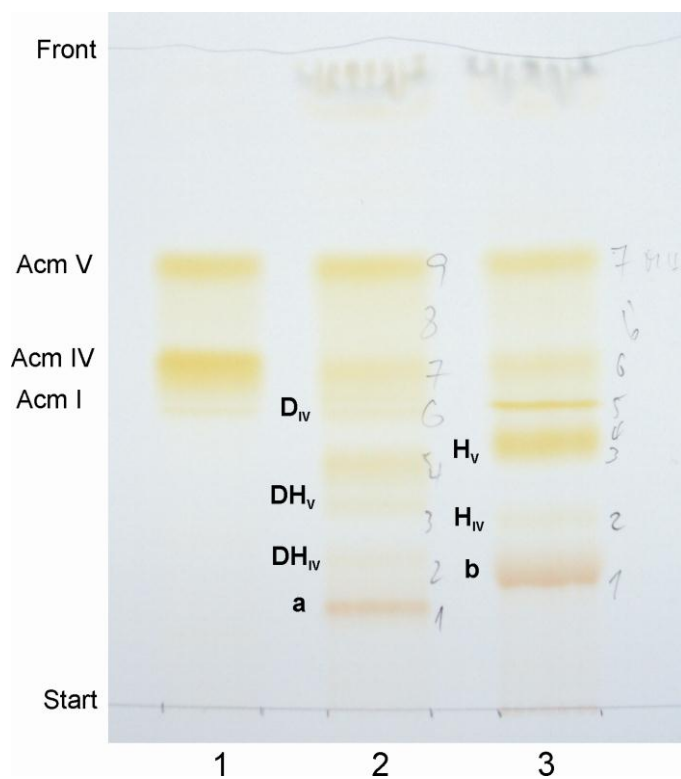

**Figure S3: Formation of C-demethylactinomycins and hemi-actinomycins in *S. antibioticus*.** Lane 1: Separation of actinomycin mixture formed in mycelial suspensions. Lane 2: Separation of actinomycins formed in the presence of 250  $\mu\text{M}$  3-hydroxyanthranilic acid (3-HA). Lane 3: Separation of actinomycins formed in the presence of 250  $\mu\text{M}$  4-methyl-3-hydroxyanthranilic acid (4-MHA). Separation was on silica plates using solvent system I. **a**: cinnabarinic acid, **b**: actinocin, **D<sub>IV</sub>**: mono-C-demethylactinomycin IV, **DH<sub>IV</sub>**: mono-C-demethyl-hemi-actinomycin V, **DH<sub>V</sub>**: mono-C-demethyl-hemi-actinomycin IV, **H<sub>V</sub>**: hemi-actinomycin V, **H<sub>IV</sub>**: hemi-actinomycin IV, Acm: actinomycin.

-----

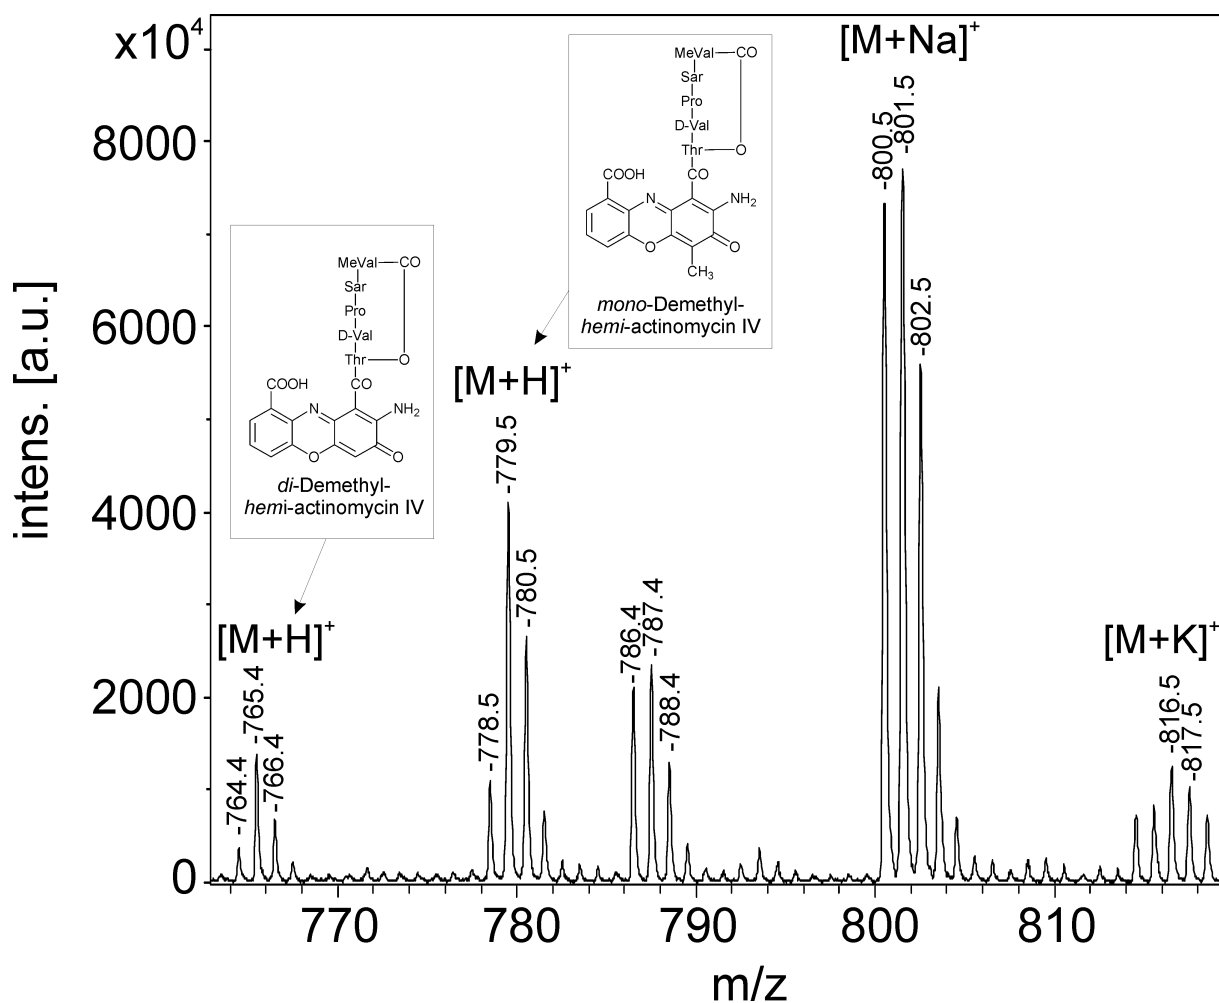

Figure S4: MALDI-TOF mass spectra of mono- and di-C-demethyl-hemi-actinomycin IV.

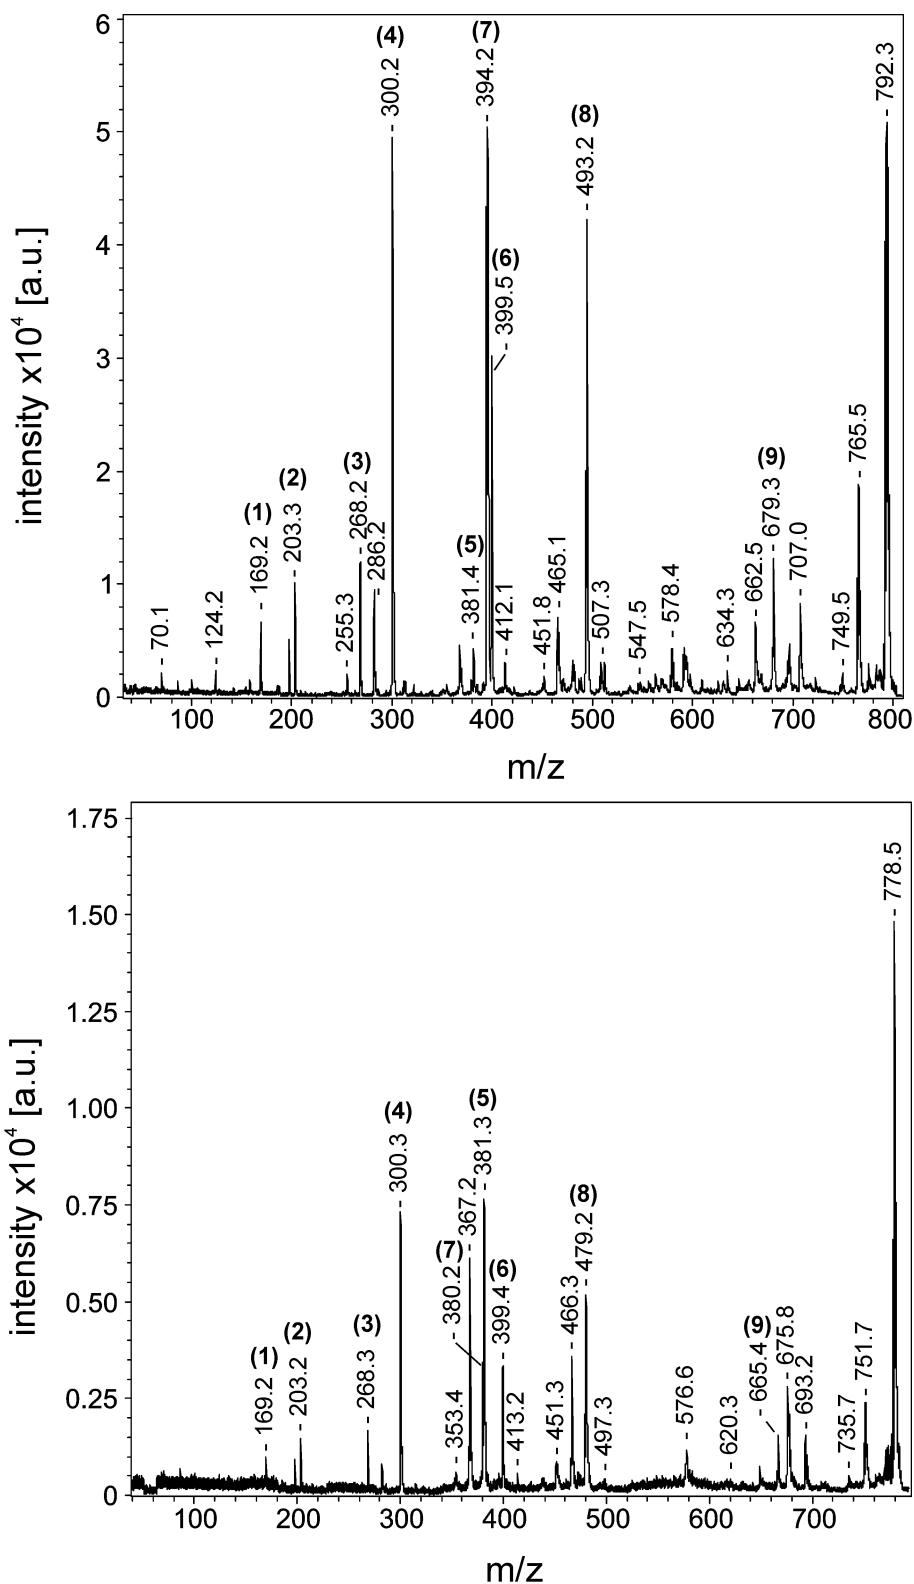

Figure S5: Mass spectra of *hemi-actinomycin IV* ( $m/z = 792.3$ ) and *mono-C-demethyl-hemi-actinomycin IV* ( $m/z = 778.5$ ) from *S. antibioticus* obtained by PSD-MALDI-TOF mass spectrometric analysis.

-----

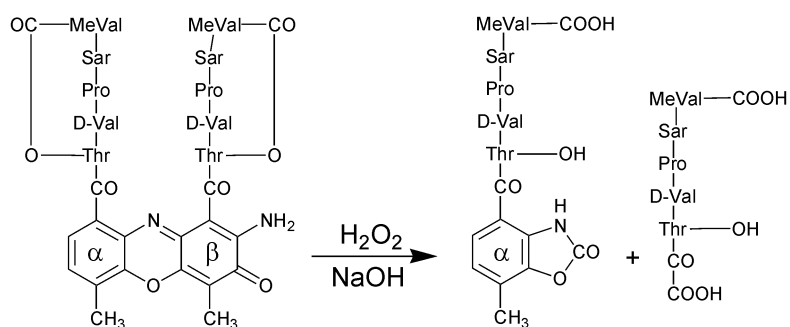

**Figure S6: Reaction scheme of alkaline oxidative cleavage of actinomycin IV by  $\text{NaOH}/\text{H}_2\text{O}_2$ .** Sar: N-methylglycine, MeVal: N-methyl-L-valine. (after Bullock E. and A.W. Johnson *J. Chem. Soc.*, 1957, **0**, 1602-1607.)

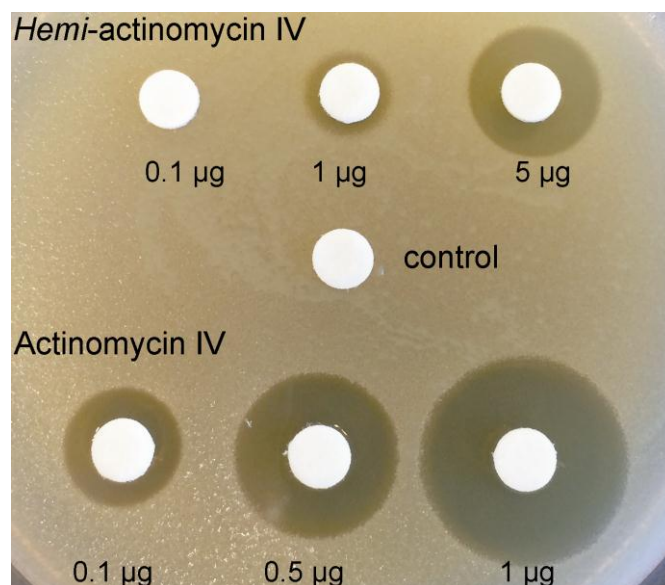

**Figure S7: Antimicrobial activity of Hemi-actinomycin IV against *Bacillus subtilis*.** Plate diffusion tests were performed as described in Material and Methods. Shown are *in vivo* inhibitory activity of *hemi*-actinomycin IV and actinomycin IV against *B. subtilis*. The indicated amounts of compounds dissolved in ethanol were spotted on paper discs (6 mm diameter, Schleicher and Schuell) and after drying were laid on a soft top nutrient agar (Difco) inoculated with 0.1 % (v/v) of an overnight culture of *Bacillus subtilis* ATCC 6633. After incubation at 30 °C over night a diameter of inhibition zones were determined.

## TABLES

### Fragment ions of *hemi-actinomycin D* species obtained by PSD-MALDI-TOF mass spectrometry

| fragments | hemiact D<br>[M + H] <sup>+</sup> = 792.6 |       | demethyl-<br>hemiact D<br>[M + H] <sup>+</sup> = 778.5 | didemethyl-<br>hemiact D<br>[M + H] <sup>+</sup> = 764.4 |
|-----------|-------------------------------------------|-------|--------------------------------------------------------|----------------------------------------------------------|
|           | calc.                                     | found | found                                                  | found                                                    |

#### Fragment ions of the peptide lactone moiety:

|               | calc. | found     | found | found |
|---------------|-------|-----------|-------|-------|
| VP            | 197.2 | 197.3     | 197.3 | 197.2 |
| PMeG          | 169.1 | 169.2 (1) | 169.2 | 169.2 |
| MeGMeV        | 185.1 | 185.4     | 185.4 | 185.6 |
| H-MeGMeV-OH   | 203.1 | 203.3 (2) | 203.2 | 203.3 |
| VPMeG         | 268.2 | 268.2 (3) | 268.3 | 268.3 |
| PMeGMeV       | 282.2 | 282.3     | 282.3 | 282.3 |
| H-PMeGMeV-OH  | 300.2 | 300.2 (4) | 300.3 | 300.4 |
| VPMeGMeV      | 381.3 | 381.4 (5) | 381.3 | 381.4 |
| H-VPMeGMeV-OH | 399.3 | 399.5 (6) | 399.4 | 399.4 |
| TVPMeGMeV     | 482.3 | 482.3     | 482.2 | n.f.  |

#### Fragment ions generated by elimination of parts of the peptide lactone moiety from hemiactinomycin D species:

##### Loss of:

|               | calc. | found     | found | found  |
|---------------|-------|-----------|-------|--------|
| V             | 693.3 | 693.5     | n.f.  | 665.2. |
| P             | 695.3 | 695.4     | 681.6 | 667.5  |
| MeV           | 679.3 | 679.3 (9) | 665.4 | 651.5  |
| VP            | 596.2 | 596.3     | 582.2 | n.f.   |
| H-VP-OH       | 578.2 | 578.2     | 564.1 | n.f.   |
| H-VPMeG-OH    | 507.2 | 507.2     | 493.2 | 497.3  |
| VPMeGMeV      | 412.1 | 412.2     | 398.1 | 384.0  |
| H-VPMeGMeV-OH | 394.1 | 394.2 (7) | 380.2 | n.f.   |
| PMeGMeV       | 511.2 | 511.3     | 497.2 | 483.6  |
| H-PMeGMeV-OH  | 493.2 | 493.2 (8) | 479.2 | n.f.   |
| MeGMeV        | 608.3 | 608.3     | 594.5 | 580.2  |
| H-MeGMeV-OH   | 590.3 | 590.3     | 576.4 | 562.3  |
| TVPMeGMeV     | 311.1 | 311.1     | 287.0 | n.f.   |

**Table S1:** The numbers set in parenthesis behind the masses of *hemi-actinomycin D* - fragments correspond to the numbers indicating prominent mass peaks in the corresponding PSD-MALDI-TOF mass spectra shown in Figure S5.

-----

|   | Actinomycin                                          | R <sub>f</sub> -values | Mol. Wt. |
|---|------------------------------------------------------|------------------------|----------|
| * | Actinomycin I                                        | 0.42-0.47              | 1271.42  |
| * | Actinomycin IV                                       | 0.52-0.58              | 1255.42  |
| * | Actinomycin V                                        | 0.65-0.69              | 1269.40  |
|   | <i>mono</i> -C-Demethylactinomycin I                 | 0.43-0.48              | 1257.39  |
| * | <i>mono</i> -C-Demethylactinomycin IV                | 0.49-0.55              | 1241.39  |
| * | <i>di</i> -C-Demethylactinomycin IV                  | 0.49-0.55              | 1227.36  |
| * | <i>mono</i> -C-Demethylactinomycin V (1)             | 0.62-0.64              | 1255.37  |
| * | <i>mono</i> -C-Demethylactinomycin V (2)             | 0.58-0.6               | 1255.37  |
| * | <i>di</i> -C-Demethylactinomycin V                   | 0.58-0.64              | 1241.35  |
| * | <i>Hemi</i> -actinomycin IV                          | 0.30-0.35              | 791.85   |
| * | <i>Hemi</i> -actinomycin V                           | 0.40-0.44              | 805.83   |
| * | <i>mono</i> -C-Demethyl- <i>hemi</i> -actinomycin IV | 0.23-0.26              | 777.82   |
| * | <i>di</i> -C-Demethyl- <i>hemi</i> -actinomycin IV   | 0.23-0.26              | 763.79   |
| * | <i>mono</i> -C-Demethyl- <i>hemi</i> -actinomycin V  | 0.37-0.4               | 791.80   |

**Table S2: List of actinomycins of the X complex from *Streptomyces antibioticus* and demethyl- and hemi-derivatives found in this study. C-Demethylactinomycins found also in natural conditions are marked with an asterisk. Separation was on silica plates using solvent system I.**
